# Supplementary material for: Characterization of miR-200 family members as blood biomarkers for human and laying hen ovarian cancer
Source: PubMed Central journal article supplement (PMC7674435; doi:10.1038/s41598-020-77068-0), 2020-11-18
Supplement: 41598_2020_77068_MOESM1_ESM.pdf [file 41598_2020_77068_MOESM1_ESM.pdf]

## Supplementary Information for

Characterization of miR-200 family members as blood biomarkers for human and laying hen ovarian cancer

Pui-Wah Choi, Abbas Bahrapour, Shu-Kay Ng, Sze Kei Liu, Wei Qiu, Fang Xie, Winston Patrick Kuo, Joseph Kwong, Karen H. Hales, Dale B. Hales, Kwong-Kwok Wong, Errol R. Norwitz, Chun Kin Chow, Ross S. Berkowitz and Shu-Wing Ng

4 Figures and 13 Tables

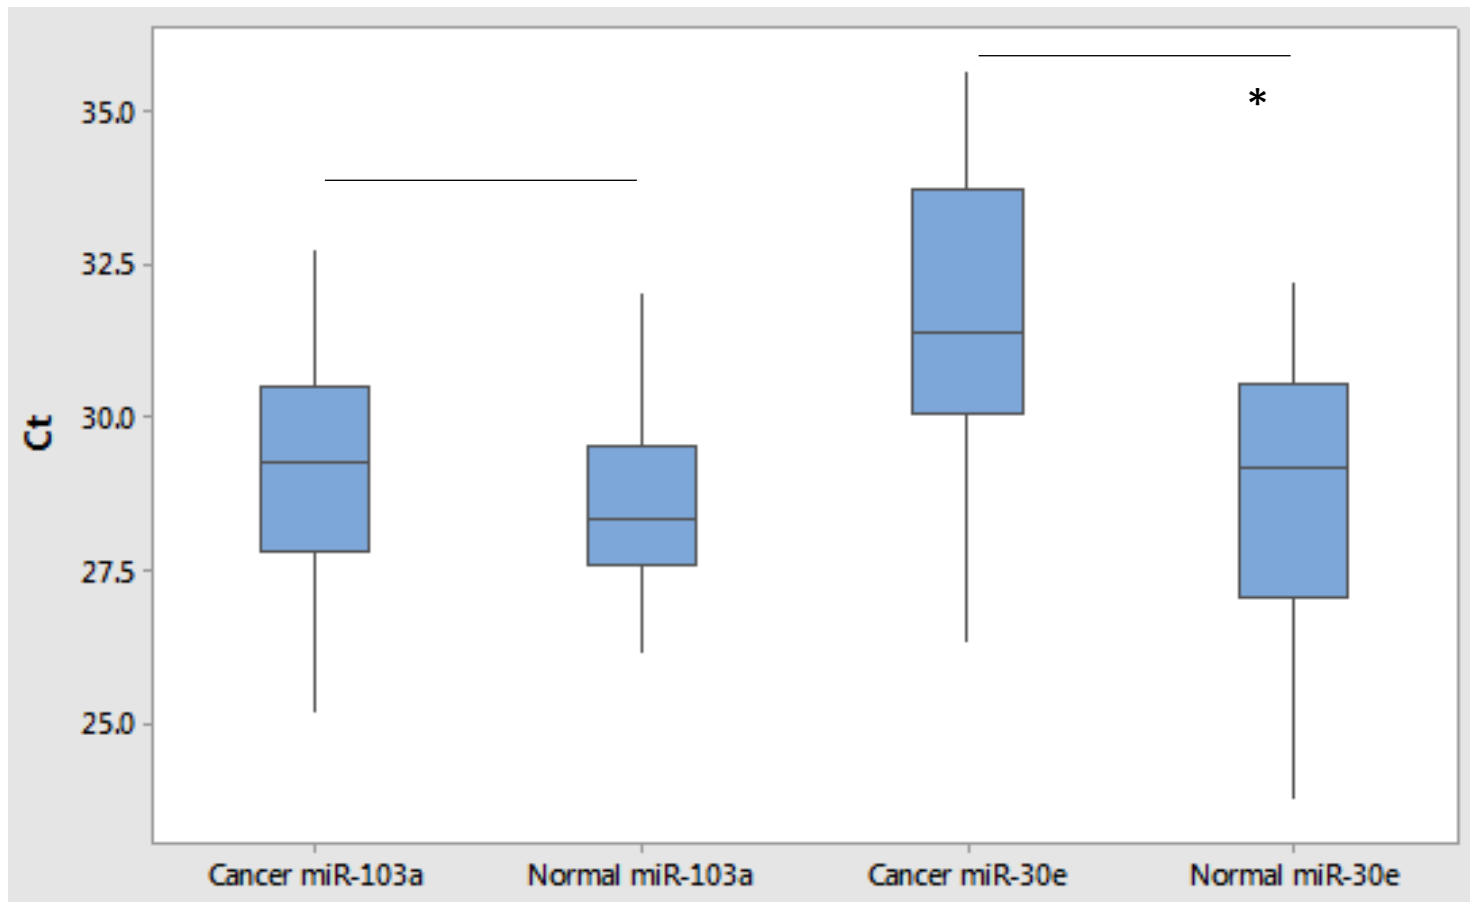

**Figure S1. Evaluation of endogenous control for miR-200 normalization.**

Boxplots showing the Ct values of miR-103a and miR-30e in 20 normal women and 20 ovarian cancer patients. \*  $P < 0.05$ .

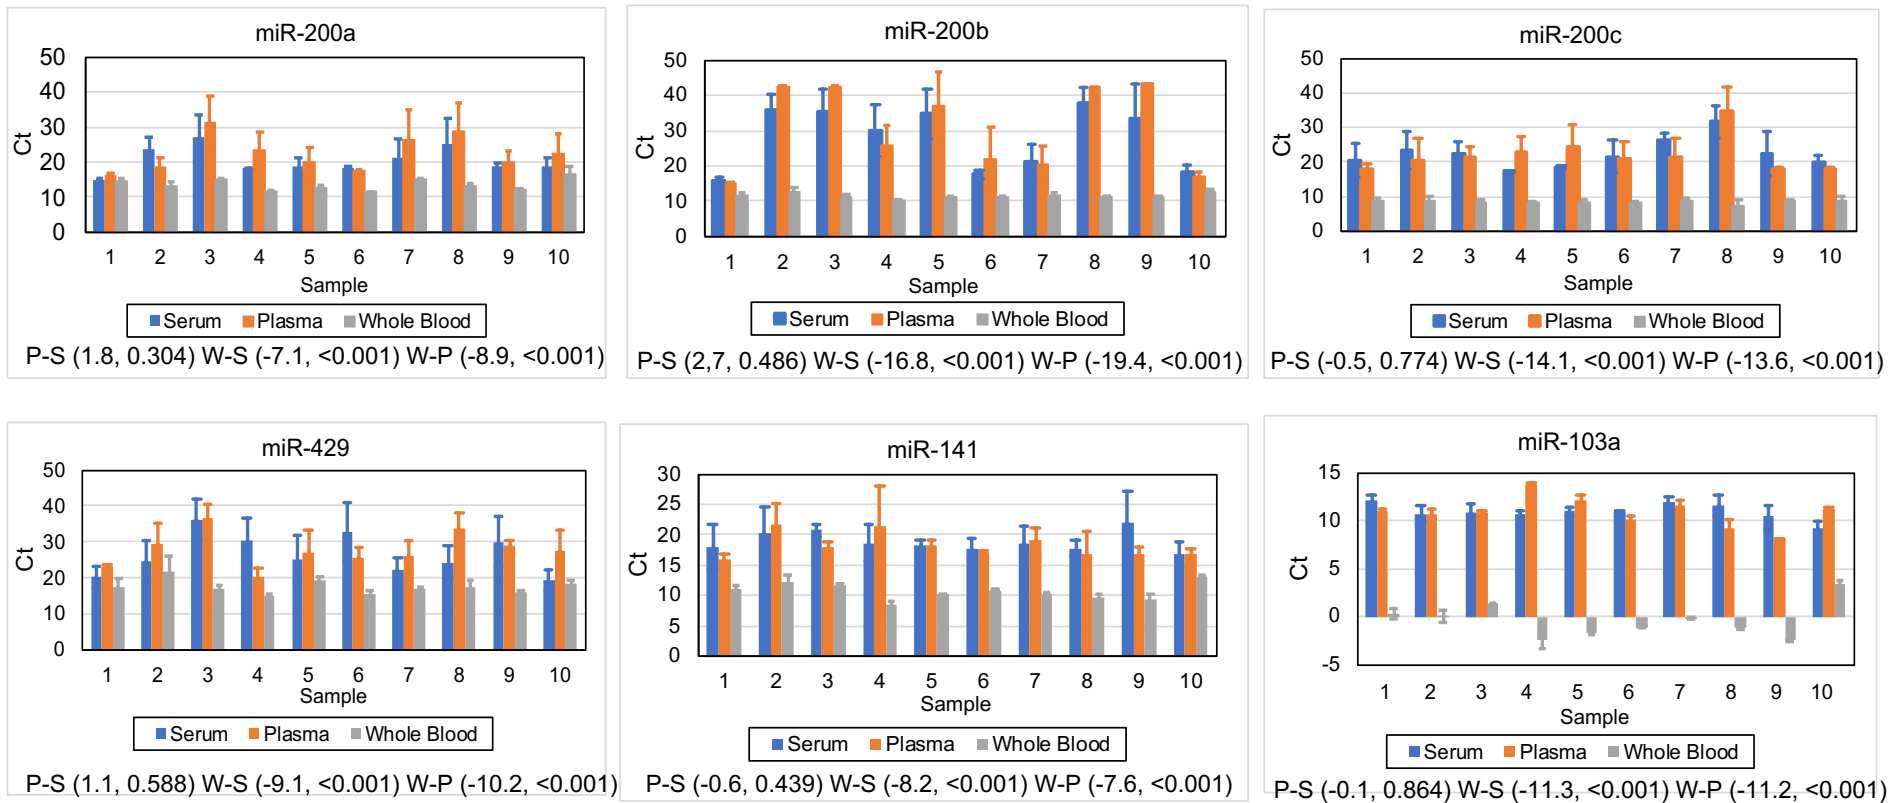

**Figure S2. Levels of miRNAs in different forms of blood samples.**

The levels of miRNA-200 family and miR-103a presented as Ct values were plotted for the plasma, serum, and whole blood specimens of ten individuals.

Below each graph, the results of statistical analysis of triplicate qPCR data using linear mixed modeling on differences between plasma (P), serum (S) and whole blood (W) samples are presented. The first numbers show the estimated mean differences, whereas the second numbers represent the P-values.

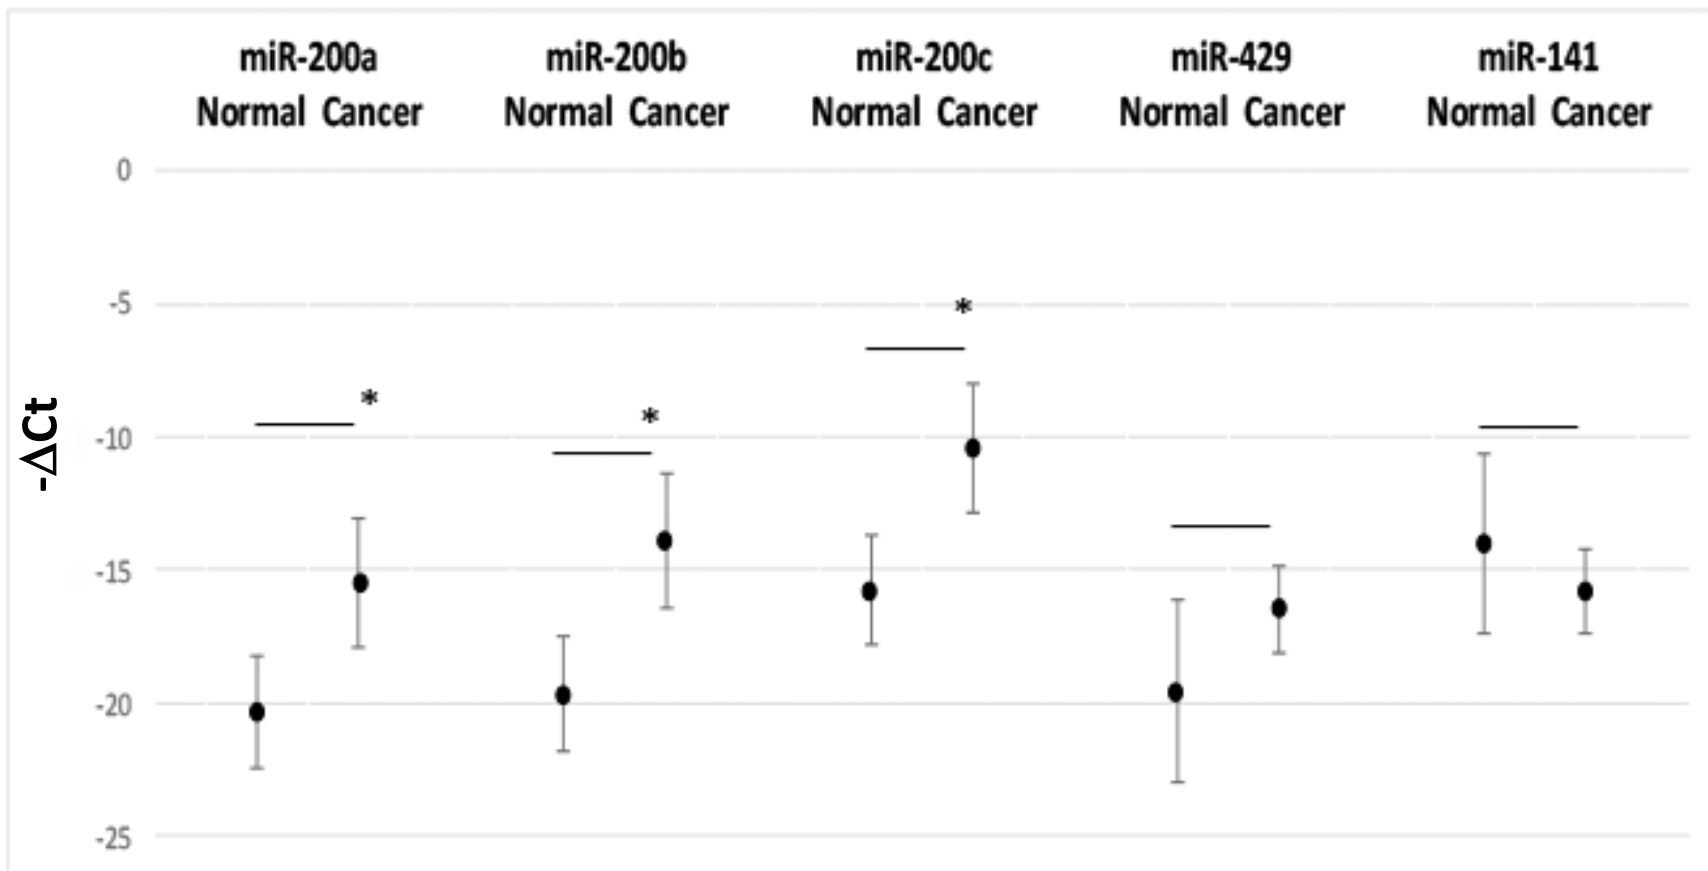

**Figure S3. Estimated mean (95% CI) levels of each miR-200 family member were plotted between Normal and Cancer human blood samples.**

\*  $P < 0.05$ .

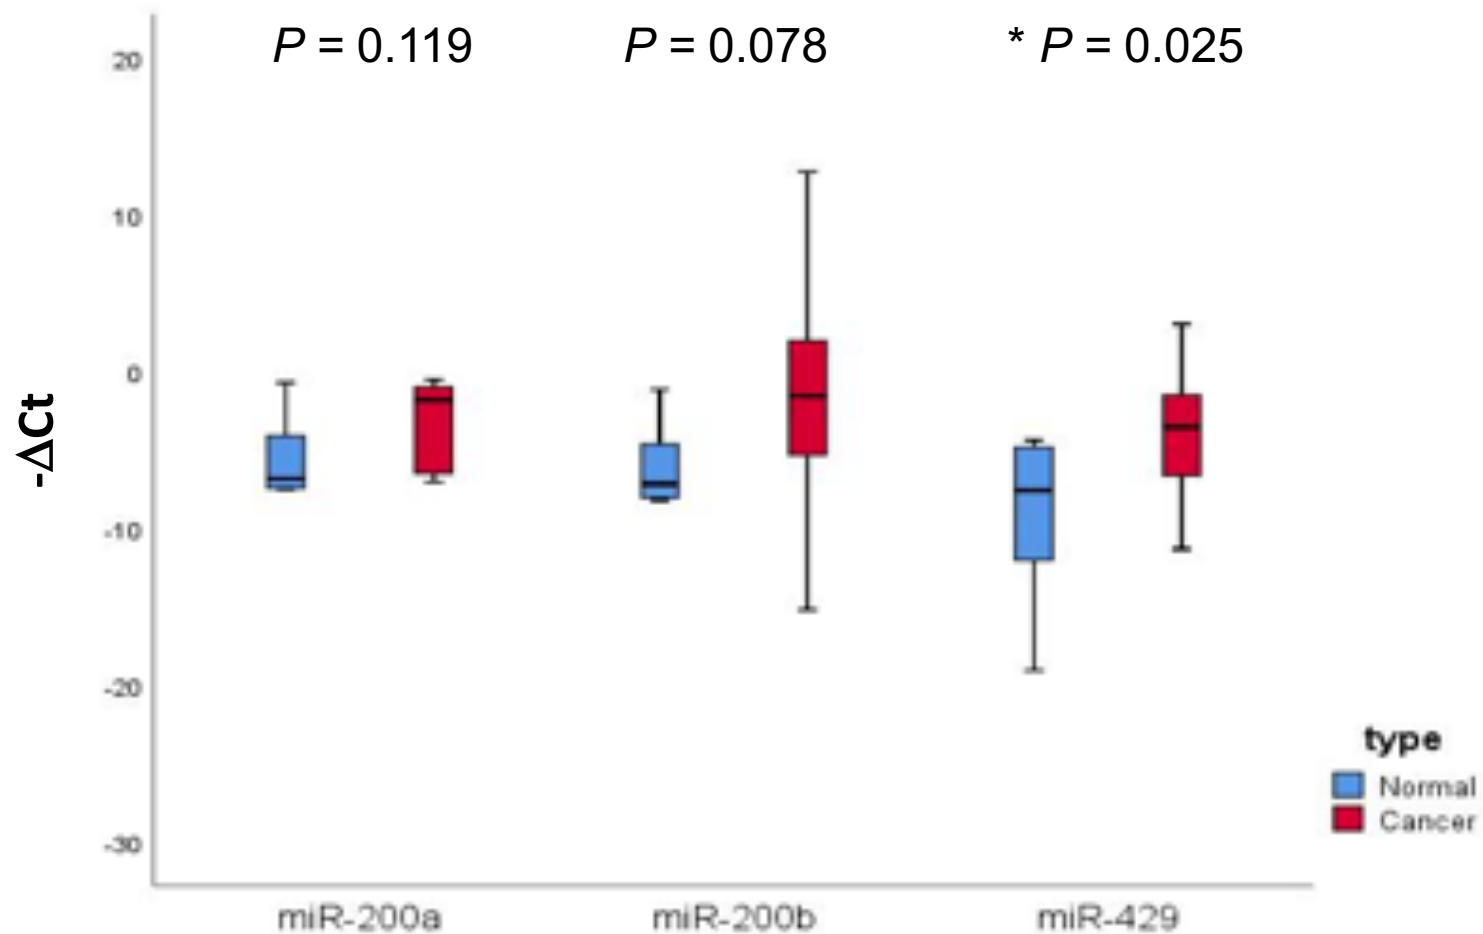

Figure S4. Boxplots showing the levels of miR-200 family members in Normal and Cancer laying hen plasmas. \* indicates significance.

**Table S1. Characteristics of the previous studies that evaluated the miR-200 family as an ovarian cancer biomarker**

| Reference          | Year | Country   | Method                                                                    | Members of miR-200    | Source           | Histologic Subtypes                          | Sample size                                                                   | Endogenous Normalizer                                                            |
|--------------------|------|-----------|---------------------------------------------------------------------------|-----------------------|------------------|----------------------------------------------|-------------------------------------------------------------------------------|----------------------------------------------------------------------------------|
| Taylor et al. (12) | 2008 | USA       | miRNA profiling using microarrays with probes for 467 human mature miRNAs | 200a, 200b, 200c, 141 | Exosome in Serum | Serous Papillary Adenocarcinoma of the ovary | 50 EOC (10 Stage 1, 10 Stage 2, 20 Stage3, 10 Stage 4), 10 Benign, 10 Healthy | Microarray Control miRNAs (Ambion)                                               |
| Kan et al. (25)    | 2012 | Australia | RT-qPCR- TaqMan miRNA assays                                              | 200a, 200b, 200c      | Serum            | Serous epithelial ovarian cancer             | 28 EOC, 28 Healthy                                                            | <u>Tested</u> : miR-103a, miR-92a, miR-638, RNU48.<br><u>Selected</u> : miR-103a |
| Zheng et al. (26)  | 2013 | China     | RT-qPCR- TaqMan miRNA assays                                              | 200a, 141             | Plasma           | Serous, Mucinous, Clear cell, Endometrioid   | 76 EOC, 30 Healthy                                                            | No endogenous control mentioned                                                  |
| Zuberi et al. (27) | 2015 | India     | RT-qPCR- customized primer                                                | 200a , 200b, 200c     | Serum            | Serous, Mucinous, Clear cell, Endometrioid   | 70 EOC, 70 Healthy                                                            | snU6                                                                             |
| Gao et al. (7)     | 2015 | China     | RT-qPCR-TaqMan miRNA reverse transcription kit (Applied Biosystems)       | 200c , 141            | Serum            | Serous, Mucinous, Clear cell, Endometrioid   | 74 EOC, 19 Borderline, 50 healthy                                             | No endogenous control mentioned                                                  |

**Table S2. Clinical characteristics of the ovarian cancer patients in this study**

| <b>Institution</b> | <b>Code</b> | <b>Age</b> | <b>Histology</b> | <b>Stage</b> | <b>Grade</b> | <b>Metastasis (Yes/No)</b> |
|--------------------|-------------|------------|------------------|--------------|--------------|----------------------------|
| BWH                | BWH01       | 70         | Serous           | IV           | High         | Yes                        |
| BWH                | BWH02       | 58         | Serous           | IIIC         | High         | Yes                        |
| BWH                | BWH03       | 57         | Serous           | IVA          | High         | Yes                        |
| BWH                | BWH04       | 57         | Serous           | IIIC         | High         | Yes                        |
| BWH                | BWH05       | 62         | Serous           | IIIC         | High         | Yes                        |
| BWH                | BWH06       | 54         | Serous           |              | High         | Yes                        |
| BWH                | BWH07       | 76         | Serous           |              | High         | Yes                        |
| BWH                | BWH08       | 75         | Serous           |              |              |                            |
| BWH                | BWH09       | 54         | Serous           |              | High         | Yes                        |
| BWH                | BWH10       | 75         | Serous           | IV           | High         | Yes                        |
| BWH                | BWH11       | 78         | Serous           | IV           | High         | Yes                        |
| BWH                | BWH12       | 70         | Serous           | III          | High         | Yes                        |
| BWH                | BWH13       | 69         | Serous           | IIIb         | High         | Yes                        |
| BWH                | BWH14       | 66         | Serous           |              | High         |                            |
| BWH                | BWH15       | 79         | Serous           | II           | High         | No                         |
| BWH                | BWH16       | 55         | Serous           |              | High         |                            |
| BWH                | BWH17       | 62         | Serous           | IIIC         | High         | Yes                        |
| BWH                | BWH18       | 68         | Serous           | IIIC         | High         | Yes                        |
| BWH                | BWH19       | 64         | Serous           | IV           | High         | Yes                        |
| BWH                | BWH20       | 71         | Serous           | IIIC         | High         | Yes                        |
| BWH                | BWH21       | 67         | Serous           | II           | High         | No                         |
| BWH                | BWH22       | 74         | Serous           | IIIb         | High         | Yes                        |
| BWH                | BWH23       | 43         | Endometrioid     | IC           | Low          | No                         |
| BWH                | BWH24       | 77         | Endometrioid     |              | Low          | No                         |
| MDA                | MD1         | 82         | Serous           | IIIC         | High         | Yes                        |
| MDA                | MD4         | 66         | Serous           | IIIC         | High         | Yes                        |
| MDA                | MD6         | 71         | Serous           | IC           | Low          | No                         |
| MDA                | MD7         | 70         | Serous           | IIA          | High         | No                         |
| MDA                | MD9         | 69         | Serous           | IIIC         | High         | Yes                        |
| MDA                | MD10        | 57         | Serous           | IIIC         | High         | Yes                        |
| MDA                | MD12        | 63         | Serous           | IIIC         | High         | Yes                        |
| MDA                | MD13        | 77         | Serous           | IIIC         | High         | yes                        |
| MDA                | MD15        | 57         | Serous           | IIIC         | High         | yes                        |
| MDA                | MD16        | 60         | Serous           | IIIC         | High         | yes                        |
| MDA                | MD17        | 61         | Serous           | IIB          | High         | No                         |
| MDA                | MD18        | 83         | Serous           | IIIC         | High         | yes                        |
| MDA                | MD19        | 75         | Serous           | IIIC         | High         | yes                        |
| MDA                | MD20        | 61         | Serous           | IIIC         | High         | yes                        |
| MDA                | MD21        | 61         | Serous           | IIA          | High         | No                         |
| MDA                | MD22        | 77         | Serous           | IIIC         | High         | Yes                        |
| MDA                | MD23        | 71         | Serous           | IIIC         | High         | Yes                        |
| MDA                | MD24        | 77         | Serous           | IIIC         | High         | Yes                        |
| MDA                | MD25        | 53         | Serous           | IIIC         | High         | yes                        |

|      |      |    |            |      |      |     |
|------|------|----|------------|------|------|-----|
| MDA  | MD27 | 68 | Serous     | IIIC | High | Yes |
| MDA  | MD29 | 50 | Serous     | IV   | High | Yes |
| MDA  | MD30 | 73 | Serous     | IIIC | High | Yes |
| MDA  | MD31 | 38 | Serous     | IIIC | High | Yes |
| MDA  | MD33 | 72 | Serous     | IIIC | High | Yes |
| MDA  | MD34 | 66 | Serous     | IIIC | High | Yes |
| CUHK | HK01 | 55 | Serous     | IC   | High | No  |
| CUHK | HK02 | 50 | Serous     | IC   | High | No  |
| CUHK | HK03 | 59 | Serous     | IC   | High | No  |
| CUHK | HK04 | 74 | Serous     | IIB  | High | No  |
| CUHK | HK05 | 56 | Serous     | IIC  | High | No  |
| CUHK | HK06 | 47 | Serous     | IIIB | High | Yes |
| CUHK | HK07 | 54 | Serous     | IIIB | High | Yes |
| CUHK | HK08 | 37 | Serous     | IIIB | High | Yes |
| CUHK | HK09 | 76 | Serous     | IIIC | High | Yes |
| CUHK | HK10 | 44 | Serous     | IIIC | High | Yes |
| CUHK | HK11 | 53 | Serous     | IIIC | High | Yes |
| CUHK | HK12 | 54 | Serous     | IIIC | High | Yes |
| CUHK | HK13 | 42 | Serous     | IIIC | High | Yes |
| CUHK | HK14 | 41 | Serous     | IIIC | High | Yes |
| CUHK | HK15 | 45 | Serous     | IIIC | High | Yes |
| CUHK | HK16 | 66 | Serous     | IIIC | High | Yes |
| CUHK | HK17 | 41 | Serous     | IIIC | High | Yes |
| CUHK | HK18 | 44 | Serous     | IIIC | High | Yes |
| CUHK | HK19 | 42 | Serous     | IIIC | High | Yes |
| CUHK | HK20 | 76 | Serous     | IIIC | High | Yes |
| CUHK | HK21 | 71 | Serous     | IV   | High | Yes |
| CUHK | HK22 | 62 | Clear Cell | IA   | High | No  |
| CUHK | HK23 | 53 | Clear Cell | IA   | High | No  |
| CUHK | HK24 | 44 | Clear Cell | IA   | High | No  |
| CUHK | HK25 | 53 | Clear Cell | IA   | High | No  |
| CUHK | HK26 | 53 | Clear Cell | IA   |      | No  |
| CUHK | HK27 | 52 | Clear Cell | IB   | High | No  |
| CUHK | HK28 | 44 | Clear Cell | IC   | High | No  |
| CUHK | HK29 | 49 | Clear Cell | IC   | High | No  |
| CUHK | HK30 | 52 | Clear Cell | IC   | High | No  |
| CUHK | HK31 | 43 | Clear Cell | IC   | High | No  |
| CUHK | HK32 | 55 | Clear Cell | IC   | High | No  |
| CUHK | HK33 | 55 | Clear Cell | IC   | High | No  |
| CUHK | HK34 | 51 | Clear Cell | IC   |      | No  |



|      |      |    |              |      |      |     |
|------|------|----|--------------|------|------|-----|
| CUHK | HK35 | 51 | Clear Cell   | IC   |      | No  |
| CUHK | HK36 | 48 | Clear Cell   | IIB  | Low  | No  |
| CUHK | HK37 | 47 | Clear Cell   | IIIC | High | Yes |
| CUHK | HK38 | 46 | Clear Cell   | IV   | High | Yes |
| CUHK | HK39 | 63 | Endometrioid | IA   | Low  | No  |
| CUHK | HK40 | 47 | Endometrioid | IC   | Low  | No  |
| CUHK | HK41 | 62 | Endometrioid | IC   | Low  | No  |
| CUHK | HK42 | 52 | Endometrioid | IC   | Low  | No  |
| CUHK | HK43 | 46 | Endometrioid | IC   | Low  | No  |
| CUHK | HK44 | 43 | Endometrioid | IC   | Low  | No  |
| CUHK | HK45 | 46 | Endometrioid | IC   | Low  | No  |
| CUHK | HK46 | 46 | Endometrioid | IC   | High | No  |
| CUHK | HK47 | 45 | Endometrioid | IC   | High | No  |
| CUHK | HK48 | 39 | Endometrioid | IC   | High | No  |
| CUHK | HK49 | 54 | Endometrioid | IC   | High | No  |
| CUHK | HK50 | 51 | Endometrioid | IIC  | Low  | No  |
| CUHK | HK51 | 51 | Endometrioid | IIC  | Low  | No  |
| CUHK | HK52 | 30 | Endometrioid | IIIC | High | Yes |
| CUHK | HK53 | 42 | Endometrioid | IIIC | High | Yes |
| CUHK | HK54 | 43 | Endometrioid | IIIC | High | Yes |
| CUHK | HK55 | 39 | Mucinous     | IA   | Low  | No  |
| CUHK | HK56 | 48 | Mucinous     | IA   | High | No  |
| CUHK | HK57 | 67 | Mucinous     | IA   | High | No  |
| CUHK | HK58 | 38 | Mucinous     | IA   | High | No  |
| CUHK | HK59 | 65 | Mucinous     | IA   | High | No  |
| CUHK | HK60 | 64 | Mucinous     | IC   | Low  | No  |
| CUHK | HK61 | 36 | Mucinous     | IC   | High | No  |
| CUHK | HK62 | 53 | Mucinous     | IC   | High | No  |
| CUHK | HK63 | 73 | Mucinous     | IC   | High | No  |
| CUHK | HK64 | 42 | Mucinous     | IC   | High | No  |
| CUHK | HK65 | 40 | Mucinous     | IC   | High | No  |
| CUHK | HK66 | 54 | Mucinous     | IC   | High | No  |
| CUHK | HK66 | 59 | Mucinous     | IC   |      | No  |
| CUHK | HK67 | 48 | Mucinous     | IIIC |      | Yes |
| CUHK | HK68 | 65 | Mucinous     | IV   | High | Yes |

Institutions: BWH = Brigham and Women's Hospital; MDA = MD Anderson Cancer Center;  
CUHK = The Chinese University of Hong Kong

**Table S3. Mean (SD) levels of miR-200 family members between Chinese and American samples**

| Normal   | Chinese      | American    | <i>P</i> -value <sup>^</sup> |
|----------|--------------|-------------|------------------------------|
| miR-200a | -16.8 (7.6)  | -22.5 (8.7) | 0.001                        |
| miR-200b | -19.4 (7.9)  | -23.4 (5.9) | 0.012                        |
| miR-200c | -12.3 (6.2)  | -21.5 (7.2) | <0.001                       |
| miR-429  | -18.0 (5.5)  | -15.2 (9.2) | 0.072                        |
| miR-141  | -10.2 (5.4)  | -21.7 (7.9) | <0.001                       |
| Cancer   | Chinese      | American    | <i>p</i> -value <sup>^</sup> |
| miR-200a | -16.0 (9.3)  | -18.8 (8.4) | 0.104                        |
| miR-200b | -13.4 (10.1) | -17.5 (9.7) | 0.03                         |
| miR-200c | -10.5 (10.3) | -15.6 (9.1) | 0.006                        |
| miR-429  | -13.6 (9.0)  | -18.0 (8.7) | 0.01                         |
| miR-141  | -14.5 (8.6)  | -16.4 (9.7) | 0.256                        |

<sup>^</sup> *P*-value using independent-sample t-test

**Table S4. Correlation analysis of miR-200 family members in all 214 samples.**

| All samples | miR-200a               | miR-200b               | miR-200c               | miR-429                | miR-141                |
|-------------|------------------------|------------------------|------------------------|------------------------|------------------------|
| miR-200a    |                        | 0.377*<br>( $<0.001$ ) | 0.454*<br>( $<0.001$ ) | 0.261*<br>( $<0.001$ ) | 0.324*<br>( $<0.001$ ) |
| miR-200b    | 0.377*<br>( $<0.001$ ) |                        | 0.517*<br>( $<0.001$ ) | 0.225*<br>(0.001)      | 0.394*<br>( $<0.001$ ) |
| miR-200c    | 0.454*<br>( $<0.001$ ) | 0.517*<br>( $<0.001$ ) |                        | 0.225*<br>(0.001)      | 0.445*<br>( $<0.001$ ) |
| miR-429     | 0.261*<br>( $<0.001$ ) | 0.225*<br>(0.001)      | 0.225*<br>(0.001)      |                        | 0.032<br>(0.641)       |
| miR-141     | 0.324*<br>( $<0.001$ ) | 0.394*<br>( $<0.001$ ) | 0.445*<br>( $<0.001$ ) | 0.032<br>(0.641)       |                        |

Data are presented as Pearson correlation coefficients (*P*-values in brackets).

\* Indicates significance.

**Table S5. Correlation analysis of miR-200 family members in all cancer samples (N=118).**

| All cancer samples | miR-200a           | miR-200b           | miR-200c           | miR-429            | miR-141            |
|--------------------|--------------------|--------------------|--------------------|--------------------|--------------------|
| miR-200a           |                    | 0.436*<br>(<0.001) | 0.532*<br>(<0.001) | 0.454*<br>(<0.001) | 0.384*<br>(<0.001) |
| miR-200b           | 0.436*<br>(<0.001) |                    | 0.559*<br>(<0.001) | 0.384*<br>(<0.001) | 0.462*<br>(<0.001) |
| miR-200c           | 0.532*<br>(<0.001) | 0.559*<br>(<0.001) |                    | 0.469*<br>(<0.001) | 0.423*<br>(<0.001) |
| miR-429            | 0.454*<br>(<0.001) | 0.384*<br>(<0.001) | 0.469*<br>(<0.001) |                    | 0.172<br>(0.062)   |
| miR-141            | 0.384*<br>(<0.001) | 0.462*<br>(<0.001) | 0.423*<br>(<0.001) | 0.172<br>(0.062)   |                    |

Data are presented as Pearson correlation coefficients (*P*-values in brackets).

\* Indicates significance.

**Table S6. Correlation analysis of miR-200 family members in all normal samples (N=96).**

| All normal samples | miR-200a          | miR-200b           | miR-200c           | miR-429            | miR-141            |
|--------------------|-------------------|--------------------|--------------------|--------------------|--------------------|
| miR-200a           |                   | 0.249*<br>(0.014)  | 0.306*<br>(0.002)  | -0.079<br>(0.445)  | 0.256*<br>(0.012)  |
| miR-200b           | 0.249*<br>(0.014) |                    | 0.364*<br>(<0.001) | -0.165<br>(0.108)  | 0.382*<br>(<0.001) |
| miR-200c           | 0.306*<br>(0.002) | 0.364*<br>(<0.001) |                    | -0.297*<br>(0.003) | 0.526*<br>(<0.001) |
| miR-429            | -0.079<br>(0.445) | -0.165<br>(0.108)  | -0.297*<br>(0.003) |                    | -0.190<br>(0.064)  |
| miR-141            | 0.256*<br>(0.012) | 0.382*<br>(<0.001) | 0.526*<br>(<0.001) | -0.190<br>(0.064)  |                    |

Data are presented as Pearson correlation coefficients (*P*-values in brackets).

\* Indicates significance.

**Table S7. Correlation analysis of miR-200 family members in all American samples (N=84).**

| American samples | miR-200a           | miR-200b           | miR-200c           | miR-429           | miR-141            |
|------------------|--------------------|--------------------|--------------------|-------------------|--------------------|
| miR-200a         |                    | 0.137<br>(0.213)   | 0.399*<br>(<0.001) | 0.027<br>(0.807)  | 0.295*<br>(0.006)  |
| miR-200b         | 0.137<br>(0.213)   |                    | 0.454*<br>(<0.001) | -0.033<br>(0.763) | 0.416*<br>(<0.001) |
| miR-200c         | 0.399*<br>(<0.001) | 0.454*<br>(<0.001) |                    | -0.036<br>(0.742) | 0.391*<br>(<0.001) |
| miR-429          | 0.027<br>(0.807)   | -0.033<br>(0.763)  | -0.036<br>(0.742)  |                   | -0.108<br>(0.328)  |
| miR-141          | 0.295*<br>(0.006)  | 0.416*<br>(<0.001) | 0.391*<br>(<0.001) | -0.108<br>(0.328) |                    |

Data are presented as Pearson correlation coefficients (*P*-values in brackets).

\* Indicates significance.

**Table S8. Correlation analysis of miR-200 family members in American cancer samples (N=49).**

| American cancer samples | miR-200a          | miR-200b          | miR-200c          | miR-429          | miR-141           |
|-------------------------|-------------------|-------------------|-------------------|------------------|-------------------|
| miR-200a                |                   | 0.178<br>(0.222)  | 0.414*<br>(0.003) | 0.256<br>(0.075) | 0.465*<br>(0.001) |
| miR-200b                | 0.178<br>(0.222)  |                   | 0.385*<br>(0.006) | 0.243<br>(0.092) | 0.364*<br>(0.010) |
| miR-200c                | 0.414*<br>(0.003) | 0.385*<br>(0.006) |                   | 0.219<br>(0.131) | 0.370*<br>(0.009) |
| miR-429                 | 0.256<br>(0.075)  | 0.243<br>(0.092)  | 0.219<br>(0.131)  |                  | 0.065<br>(0.658)  |
| miR-141                 | 0.465*<br>(0.001) | 0.364*<br>(0.010) | 0.370*<br>(0.009) | 0.065<br>(0.658) |                   |

Data are presented as Pearson correlation coefficients (*P*-values in brackets).

\* Indicates significance.

**Table S9. Correlation analysis of miR-200 family members in American normal samples (N=35).**

| American normal samples | miR-200a          | miR-200b           | miR-200c          | miR-429            | miR-141           |
|-------------------------|-------------------|--------------------|-------------------|--------------------|-------------------|
| miR-200a                |                   | -0.158<br>(0.364)  | 0.262<br>(0.129)  | -0.188<br>(0.279)  | -0.102<br>(0.560) |
| miR-200b                | -0.158<br>(0.364) |                    | 0.396*<br>(0.019) | -0.465*<br>(0.005) | 0.347*<br>(0.041) |
| miR-200c                | 0.262<br>(0.129)  | 0.396*<br>(0.019)  |                   | -0.323<br>(0.058)  | 0.238<br>(0.168)  |
| miR-429                 | -0.188<br>(0.279) | -0.465*<br>(0.005) | -0.323<br>(0.058) |                    | -0.285<br>(0.097) |
| miR-141                 | -0.102<br>(0.560) | 0.347*<br>(0.041)  | 0.238<br>(0.168)  | -0.285<br>(0.097)  |                   |

Data are presented as Pearson correlation coefficients (*P*-values in brackets).

\* Indicates significance.



**Table S10. Correlation analysis of miR-200 family members in all Chinese samples (N=130).**

| Chinese samples | miR-200a           | miR-200b           | miR-200c           | miR-429            | miR-141            |
|-----------------|--------------------|--------------------|--------------------|--------------------|--------------------|
| miR-200a        |                    | 0.478*<br>(<0.001) | 0.422*<br>(<0.001) | 0.422*<br>(<0.001) | 0.255*<br>(0.003)  |
| miR-200b        | 0.478*<br>(<0.001) |                    | 0.511*<br>(<0.001) | 0.385*<br>(<0.001) | 0.320*<br>(<0.001) |
| miR-200c        | 0.422*<br>(<0.001) | 0.511*<br>(<0.001) |                    | 0.403*<br>(<0.001) | 0.353*<br>(<0.001) |
| miR-429         | 0.422*<br>(<0.001) | 0.385*<br>(<0.001) | 0.403*<br>(<0.001) |                    | 0.115<br>(0.194)   |
| miR-141         | 0.255*<br>(0.003)  | 0.320*<br>(<0.001) | 0.353*<br>(<0.001) | 0.115<br>(0.194)   |                    |

Data are presented as Pearson correlation coefficients (*P*-values in brackets).

\* Indicates significance.

**Table S11. Correlation analysis of miR-200 family members in Chinese cancer samples (N=69).**

| Chinese cancer samples | miR-200a           | miR-200b           | miR-200c           | miR-429            | miR-141            |
|------------------------|--------------------|--------------------|--------------------|--------------------|--------------------|
| miR-200a               |                    | 0.566*<br>(<0.001) | 0.575*<br>(<0.001) | 0.547*<br>(<0.001) | 0.313*<br>(0.009)  |
| miR-200b               | 0.566*<br>(<0.001) |                    | 0.628*<br>(<0.001) | 0.425*<br>(<0.001) | 0.523*<br>(<0.001) |
| miR-200c               | 0.575*<br>(<0.001) | 0.628*<br>(<0.001) |                    | 0.566*<br>(<0.001) | 0.448*<br>(<0.001) |
| miR-429                | 0.547*<br>(<0.001) | 0.425*<br>(<0.001) | 0.566*<br>(<0.001) |                    | 0.221<br>(0.068)   |
| miR-141                | 0.313*<br>(0.009)  | 0.523*<br>(<0.001) | 0.448*<br>(<0.001) | 0.221<br>(0.068)   |                    |

Data are presented as Pearson correlation coefficients (*P*-values in brackets).

\* Indicates significance.

**Table S12. Correlation analysis of miR-200 family members in Chinese normal samples (N=61).**

| Chinese normal samples | miR-200a          | miR-200b          | miR-200c          | miR-429           | miR-141           |
|------------------------|-------------------|-------------------|-------------------|-------------------|-------------------|
| miR-200a               |                   | 0.351*<br>(0.006) | 0.078<br>(0.548)  | 0.163<br>(0.210)  | 0.214<br>(0.098)  |
| miR-200b               | 0.351*<br>(0.006) |                   | 0.225<br>(0.082)  | 0.103<br>(0.431)  | 0.286*<br>(0.025) |
| miR-200c               | 0.078<br>(0.548)  | 0.225<br>(0.082)  |                   | -0.153<br>(0.239) | 0.269*<br>(0.036) |
| miR-429                | 0.163<br>(0.210)  | 0.103<br>(0.431)  | -0.153<br>(0.239) |                   | 0.179<br>(0.168)  |
| miR-141                | 0.214<br>(0.098)  | 0.286*<br>(0.025) | 0.269*<br>(0.036) | 0.179<br>(0.168)  |                   |

Data are presented as Pearson correlation coefficients (*P*-values in brackets).

\* Indicates significance.

**Table S13. Correlation analysis of miR-200 family members in laying hens (N=27).**

| All chicken samples | miR-200a           | miR-200b           | miR-429            |
|---------------------|--------------------|--------------------|--------------------|
| miR-200a            |                    | 0.817*<br>(<0.001) | 0.535*<br>(0.005)  |
| miR-200b            | 0.817*<br>(<0.001) |                    | 0.661*<br>(<0.001) |
| miR-429             | 0.535*<br>(0.005)  | 0.661*<br>(<0.001) |                    |

Data are presented as Pearson correlation coefficients (*P*-values in brackets).

\* Indicates significance.
